# Supplementary material for: Urinary titin is not an early biomarker of skeletal muscle atrophy induced by muscle denervation in mice
Source: PubMed Central journal article supplement (PMC10426992; doi:10.1371/journal.pone.0289185), 2023-08-15
Supplement: pone.0289185.s007.pdf [file pone.0289185.s007.pdf]

Fig. 1C\_raw\_images

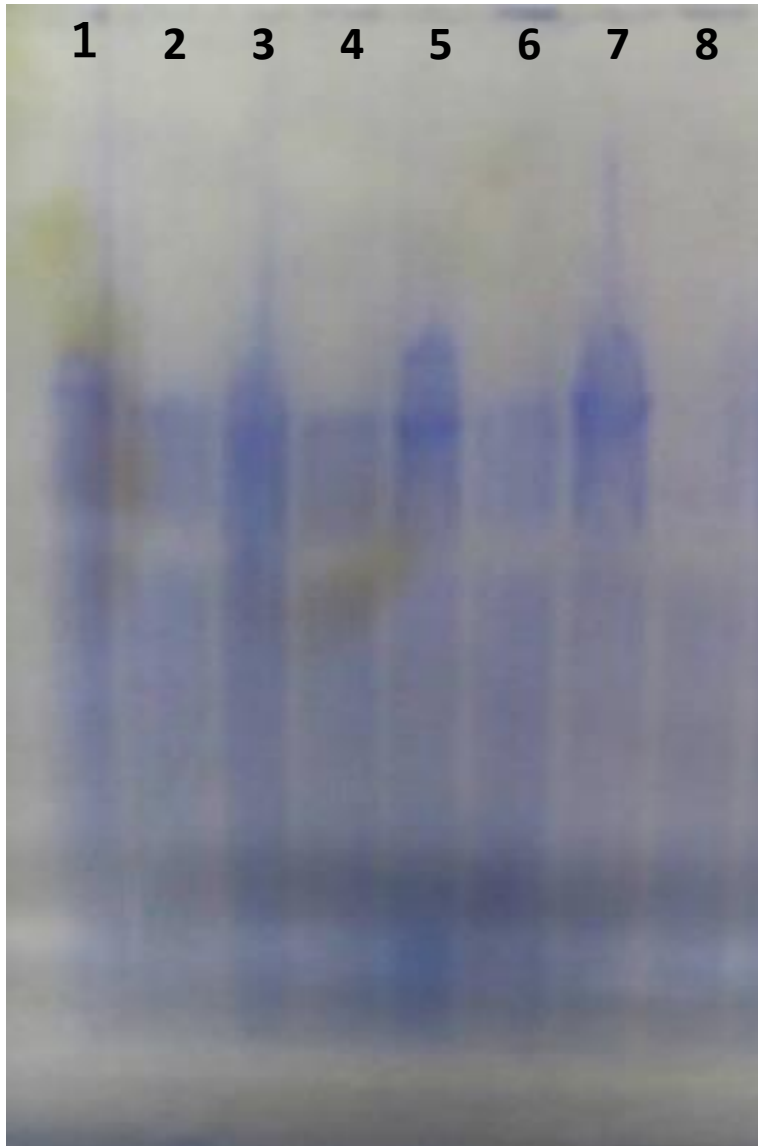

← **Titin**

Lane 1: CON group TA muscle

Lane 2: DEN group TA muscle

Lane 3: CON group TA muscle

Lane 4: DEN group TA muscle

Lane 5: CON group TA muscle

Lane 6: DEN group TA muscle

Lane 7: CON group TA muscle

Lane 8: DEN group TA muscle
