# Supplementary material for: Urinary titin is not an early biomarker of skeletal muscle atrophy induced by muscle denervation in mice
Source: PubMed Central journal article supplement (PMC10426992; doi:10.1371/journal.pone.0289185), 2023-08-15
Supplement: pone.0289185.s009.pdf [file pone.0289185.s009.pdf]

Fig. 4C\_raw\_images

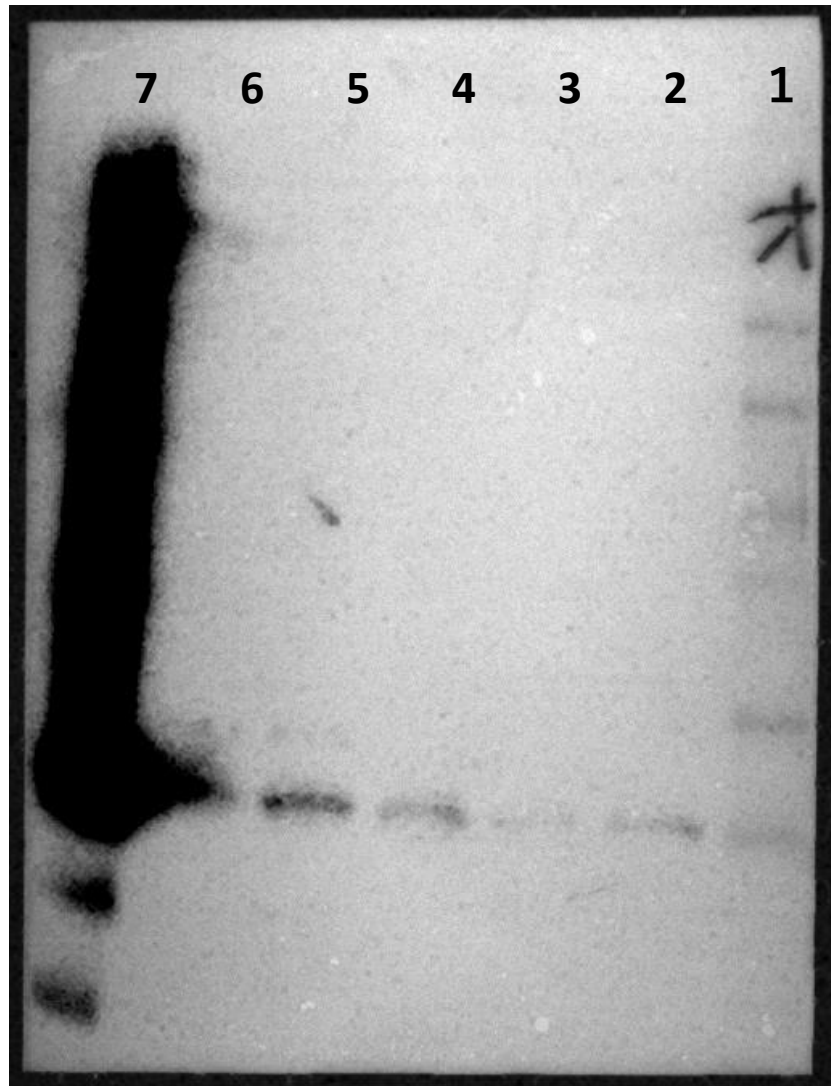

Lane 1: Marker

Lane 2: CON group TA muscle

Lane 3: CON group TA muscle

Lane 4: DEN group TA muscle

Lane 5: DEN group TA muscle

Lane 6: DEN group TA muscle

Lane 7: Cardiac muscle (Positive control)

← **Connexin 43**
